# Supplementary material for: A global evaluation of advanced dosimetry in transarterial radioembolization of hepatocellular carcinoma with Yttrium-90: the TARGET study
Source: Springer Nature journal article supplement (doi:10.1007/s00259-022-05774-0), 2022-04-08
Supplement: MOESM1 [file 20296806]

## Supplementary Information

### **A Global Evaluation of Advanced Dosimetry in Transarterial Radioembolization of Hepatocellular Carcinoma with Yttrium-90: The TARGET Study**

Marnix Lam, MD, PhD<sup>1</sup>; Etienne Garin, MD, PhD<sup>2</sup>; Marco Maccauro, MD<sup>3</sup>; S. Cheenu Kappadath, PhD<sup>4</sup>; Daniel Y. Sze, MD, PhD<sup>5</sup>; Cuneyt Turkmen, MD<sup>6</sup>; Murat Cantasdemir, MD<sup>7</sup>; Paul Haste, MD<sup>8</sup>; Ken Herrmann, MD<sup>9</sup>; Hamad Saleh Alsuhaibani, MD<sup>10</sup>; Matthew Dreher, PhD<sup>11</sup>; Kirk D. Fowers, PhD<sup>11</sup>; Riad Salem, MD<sup>12</sup>

1. Department of Radiology and Nuclear Medicine, University Medical Center Utrecht, The Netherlands
2. Nuclear Medicine Department, Eugene Marquis Center, Rennes, France
3. Nuclear Medicine Unit, Fondazione IRCCS Istituto Nazionale dei Tumori, Italy
4. Department of Imaging Physics, University of Texas MD Anderson Cancer Center, Houston, TX, USA
5. Division of Interventional Radiology, Stanford University, Stanford, CA, USA
6. Department of Nuclear Medicine, Istanbul Faculty of Medicine, Istanbul University, Istanbul, Turkey
7. Division of Interventional Radiology, Istanbul Florence Nightingale Hospital, Istanbul, Turkey
8. Department of Clinical Radiology and Imaging Sciences, Indiana University School of Medicine, Indianapolis, IN, USA
9. Department of Nuclear Medicine, University of Duisburg-Essen, and German Cancer Consortium (DKTK)-University Hospital Essen, Essen, Germany
10. Department of Radiology, King Faisal Specialist Hospital, Riyadh, Saudi Arabia
11. Boston Scientific Corporation, Marlborough, MA, USA
12. Department of Radiology, Northwestern Feinberg School of Medicine, Chicago, IL, USA

Corresponding Author:

Marnix Lam: m.lam@umcutrecht.nl

#### **Table of Contents**

**Table S1. Univariable and Multivariable Logistic Regression Analyses of Objective Response by mRECIST**

**Table S2. Univariable and Multivariable Logistic Regression Analyses of Objective Response by RECIST 1.1**

**Table S3. Univariable and Multivariable Cox Regression Analyses of Overall Survival**

**Table S1. Univariable and Multivariable Logistic Regression Analyses of Objective Response by mRECIST**

| Variable                                      | Category                   | Univariable Analyses   |         | Final Multivariable Analysis |         |
|-----------------------------------------------|----------------------------|------------------------|---------|------------------------------|---------|
|                                               |                            | Odds Ratio (95% CI)    | P-value | Odds Ratio (95% CI)          | P-value |
| Tumor Absorbed Dose <sup>a</sup>              |                            |                        |         | 1.26<br>(1.02 – 1.55)        | 0.033   |
| Gender                                        | Male                       | 0.47<br>(0.22 – 1.01)  | 0.052   | 0.43<br>(0.19 – 0.94)        | 0.035   |
|                                               | Female                     | 1                      |         | 1                            |         |
| Ascites at Baseline                           | Slight                     | 0.78<br>(0.32 – 1.92)  | 0.589   | --                           | --      |
|                                               | Absent                     | 1                      |         | --                           |         |
| Splenomegaly at Baseline                      | Present                    | 0.59<br>(0.33 – 1.04)  | 0.067   | --                           | --      |
|                                               | Absent                     | 1                      |         | --                           |         |
| HCC Liver Status                              | Liver Cirrhosis            | 0.95<br>(0.32 – 2.82)  | 0.916   | --                           | --      |
|                                               | Liver Fibrosis             | 1.36<br>(0.19 – 9.75)  |         | --                           |         |
|                                               | Normal Liver               | 1                      |         | --                           |         |
| HCC Etiology                                  | Alcohol Use                | 1.35<br>(0.49 – 3.76)  | 0.686   | --                           | --      |
|                                               | Hepatitis C                | 1.92<br>(0.74 – 4.98)  |         | --                           |         |
|                                               | NASH/NAFLD                 | 2.39<br>(0.70 – 8.17)  |         | --                           |         |
|                                               | More than one HCC Etiology | 1.79<br>(0.51 – 6.31)  |         | --                           |         |
|                                               | Unknown                    | 1.32<br>(0.50 – 3.49)  |         | --                           |         |
|                                               | Hepatitis B                | 1                      |         | --                           |         |
| Largest Tumor Size at Baseline by mRECIST     | < 3 cm                     | 0.64<br>(0.04 – 10.76) | 0.901   | --                           | --      |
|                                               | ≥3 to <5 cm                | 0.76<br>(0.35 – 1.64)  |         | --                           |         |
|                                               | ≥5 to <8 cm                | 0.95<br>(0.48 – 1.87)  |         | --                           |         |
|                                               | ≥ 8 cm                     | 1                      |         | --                           |         |
| Log Number of Tumors at Baseline <sup>b</sup> |                            | 1.05<br>(0.53 – 2.09)  | 0.880   | --                           | --      |

| Variable                                               | Category                    | Univariable Analyses  |         | Final Multivariable Analysis |         |
|--------------------------------------------------------|-----------------------------|-----------------------|---------|------------------------------|---------|
|                                                        |                             | Odds Ratio (95% CI)   | P-value | Odds Ratio (95% CI)          | P-value |
| Unilobar or Bilobar Disease                            | Bilobar                     | 1.05<br>(0.56 – 1.95) | 0.884   | --                           | --      |
|                                                        | Unilobar                    | 1                     |         | --                           |         |
| Child-Pugh at Baseline                                 | A5                          | 1.15<br>(0.65 – 2.03) | 0.634   | --                           | --      |
|                                                        | A6 or B7                    | 1                     |         | --                           |         |
| PVT at Baseline                                        | Present                     | 0.86<br>(0.47 – 1.57) | 0.628   | --                           | --      |
|                                                        | Absent                      | 1                     |         | --                           |         |
| Untreated liver fraction <sup>c</sup>                  |                             | 0.99<br>(0.97 – 1.01) | 0.272   | --                           | --      |
| Prior Sorafenib Treatment                              | Yes                         | 0.96<br>(0.38 – 2.43) | 0.931   | --                           | --      |
|                                                        | No                          | 1                     |         | --                           |         |
| BCLC Stage at Baseline                                 | A                           | 0.58<br>(0.24 – 1.42) | 0.483   | --                           | --      |
|                                                        | B                           | 0.94<br>(0.50 – 1.77) |         | --                           |         |
|                                                        | C                           | 1                     |         | --                           |         |
| ALBI Score at Baseline                                 | 1                           | 1.48<br>(0.81 – 2.70) | 0.198   | --                           | --      |
|                                                        | 2 or 3                      | 1                     |         | --                           |         |
| PVT <sup>99m</sup> Tc-MAA targeting                    | No PVT                      | 0.99<br>(0.37 – 2.62) | 0.889   | --                           | --      |
|                                                        | No PVT targeting            | 1.15<br>(0.56 – 2.40) |         | --                           |         |
|                                                        | PVT targeting               | 1                     |         | --                           |         |
| CT or MRI for Diagnostic and Response Imaging          | CT                          | 1.65<br>(0.83 – 3.31) | 0.156   | --                           | --      |
|                                                        | MRI                         | 1                     |         | --                           |         |
| Pre-procedural <sup>99m</sup> Tc-MAA SPECT vs SPECT/CT | <sup>99m</sup> Tc-MAA SPECT | 0.69<br>(0.32 – 1.50) | 0.347   | --                           | --      |
|                                                        | SPECT/CT                    | 1                     |         | --                           |         |
| Week of TARE Administration                            | Second                      | 1.46<br>(0.79 – 2.70) | 0.231   | --                           | --      |
|                                                        | First                       | 1                     |         | --                           |         |
| Deformable Registration                                | Yes                         | 1.54<br>(0.85 – 2.81) | 0.158   | --                           | --      |
|                                                        | No                          | 1                     |         | --                           |         |

| Variable                                                  | Category   | Univariable Analyses  |         | Final Multivariable Analysis |         |
|-----------------------------------------------------------|------------|-----------------------|---------|------------------------------|---------|
|                                                           |            | Odds Ratio (95% CI)   | P-value | Odds Ratio (95% CI)          | P-value |
| Similarity Score Between Injection Locations <sup>d</sup> | 1          | 0.60<br>(0.28 – 1.28) | 0.359   | --                           | --      |
|                                                           | 2          | 0.53<br>(0.19 – 1.48) |         | --                           |         |
|                                                           | 3          | 1                     |         | --                           |         |
| Bilirubin at Baseline                                     | <1.0 mg/dL | 3.22<br>(1.74 – 5.95) | <0.001  | 3.39<br>(1.81 – 6.34)        | <0.001  |
|                                                           | ≥1.0 mg/dL | 1                     |         | 1                            |         |
| Albumin at Baseline                                       | <3.6 g/dL  | 0.96<br>(0.54 – 1.72) | 0.888   | --                           | --      |
|                                                           | ≥3.6 g/dL  | 1                     |         | --                           |         |

CI = Confidence Interval

<sup>a</sup> Odds ratio for tumor absorbed dose corresponds to a 100 Gy increase in absorbed dose.

<sup>b</sup> Odds ratio corresponds to a 1 unit increase in this variable where 69.4% of patients had a solitary tumor, 21.5% had two tumors and 9.1% had ≥3 tumors.

<sup>c</sup> Odds ratio corresponds to a 1 unit increase in this variable where 33% of patients had an untreated liver fraction of <30%, 46.9% were 30-50% and 20.1% were >50%.

<sup>d</sup> Odds ratio corresponds to comparison of similarity scores between injection locations for <sup>99m</sup>Tc-MAA and TARE of 1) nearly identical (≤1 cm) with no influence of bifurcations, 2) similar location (>1 and ≤2 cm) with no influence of bifurcations, 3) dissimilar location (>2 cm) or influence of a bifurcation.

**Table S2. Univariable and Multivariable Logistic Regression Analyses of Objective Response by RECIST 1.1**

| Variable                                      | Category                   | Univariable Analyses |         | Final Multivariable Analysis |         |
|-----------------------------------------------|----------------------------|----------------------|---------|------------------------------|---------|
|                                               |                            | Odds Ratio (95% CI)  | P-value | Odds Ratio (95% CI)          | P-value |
| Tumor Absorbed Dose <sup>a</sup>              |                            |                      |         | 1.22 (1.02 – 1.47)           | 0.028   |
| Gender                                        | Male                       | 0.66 (0.33 – 1.33)   | 0.250   | --                           | --      |
|                                               | Female                     | 1                    |         | --                           |         |
| Ascites at Baseline                           | Slight                     | 0.76 (0.28 – 2.04)   | 0.581   | --                           | --      |
|                                               | Absent                     | 1                    |         | --                           |         |
| Splenomegaly at Baseline                      | Present                    | 0.91 (0.51 – 1.62)   | 0.741   | --                           | --      |
|                                               | Absent                     | 1                    |         | --                           |         |
| HCC Liver Status                              | Liver Cirrhosis            | 2.03 (0.55 – 7.53)   | 0.569   | --                           | --      |
|                                               | Liver Fibrosis             | 0.00 (0.00 – >999)   |         | --                           |         |
|                                               | Normal Liver               | 1                    |         | --                           |         |
| HCC Etiology                                  | Alcohol Use                | 1.74 (0.60 – 5.07)   | 0.363   | --                           | --      |
|                                               | Hepatitis C                | 1.35 (0.50 – 3.67)   |         | --                           |         |
|                                               | NASH/NAFLD                 | 0.58 (0.15 – 2.16)   |         | --                           |         |
|                                               | More than one HCC Etiology | 1.24 (0.34 – 4.45)   |         | --                           |         |
|                                               | Unknown                    | 0.74 (0.25 – 2.17)   |         | --                           |         |
|                                               | Hepatitis B                | 1                    |         | --                           |         |
| Largest Tumor Size at Baseline by mRECIST     | < 3 cm                     | 2.50 (0.15 – 41.96)  | 0.880   | --                           | --      |
|                                               | ≥3 to <5 cm                | 1.07 (0.48 – 2.35)   |         | --                           |         |
|                                               | ≥5 to <8 cm                | 1.22 (0.61 – 2.42)   |         | --                           |         |
|                                               | ≥ 8 cm                     | 1                    |         | --                           |         |
| Log Number of Tumors at Baseline <sup>b</sup> |                            | 1.51 (0.77 – 2.98)   | 0.231   | --                           | --      |
| Unilobar or Bilobar Disease                   | Bilobar                    | 1.12 (0.59 – 2.10)   | 0.731   | --                           | --      |

| Variable                                                  | Category                    | Univariable Analyses  |         | Final Multivariable Analysis |         |
|-----------------------------------------------------------|-----------------------------|-----------------------|---------|------------------------------|---------|
|                                                           |                             | Odds Ratio (95% CI)   | P-value | Odds Ratio (95% CI)          | P-value |
|                                                           | Unilobar                    | 1                     |         | --                           |         |
| Child-Pugh at Baseline                                    | A5                          | 0.97<br>(0.54 – 1.74) | 0.909   | --                           | --      |
|                                                           | A6 or B7                    | 1                     |         | --                           |         |
| PVT at Baseline                                           | Present                     | 1.14<br>(0.61 – 2.12) | 0.675   | --                           | --      |
|                                                           | Absent                      | 1                     |         | --                           |         |
| Untreated liver fraction <sup>c</sup>                     |                             | 0.99<br>(0.97 – 1.00) | 0.126   | --                           | --      |
| Prior Sorafenib Treatment                                 | Yes                         | 1.45<br>(0.56 – 3.76) | 0.443   | --                           | --      |
|                                                           | No                          | 1                     |         | --                           |         |
| BCLC Stage at Baseline                                    | A                           | 0.45<br>(0.16 – 1.27) | 0.306   | --                           | --      |
|                                                           | B                           | 0.97<br>(0.51 – 1.84) |         | --                           |         |
|                                                           | C                           | 1                     |         | --                           |         |
| ALBI Score at Baseline                                    | 1                           | 1.11<br>(0.61 – 2.01) | 0.743   | --                           | --      |
|                                                           | 2 or 3                      | 1                     |         | --                           |         |
| PVT <sup>99m</sup> Tc-MAA targeting                       | No PVT                      | 0.97<br>(0.35 – 2.67) | 0.914   | --                           | --      |
|                                                           | No PVT targeting            | 0.87<br>(0.41 – 1.83) |         | --                           |         |
|                                                           | PVT targeting               | 1                     |         | --                           |         |
| CT or MRI for Diagnostic and Response Imaging             | CT                          | 1.25<br>(0.60 – 2.63) | 0.549   | --                           | --      |
|                                                           | MRI                         | 1                     |         | --                           |         |
| Pre-procedural <sup>99m</sup> Tc- MAA SPECT vs SPECT/CT   | <sup>99m</sup> Tc-MAA SPECT | 0.87<br>(0.38 – 1.98) | 0.738   | --                           | --      |
|                                                           | SPECT/CT                    | 1                     |         | --                           |         |
| Week of TARE Administration                               | Second                      | 1.52<br>(0.83 – 2.81) | 0.177   | --                           | --      |
|                                                           | First                       | 1                     |         | --                           |         |
| Deformable Registration                                   | Yes                         | 1.50<br>(0.83 – 2.71) | 0.184   | --                           | --      |
|                                                           | No                          | 1                     |         | --                           |         |
| Similarity Score Between Injection Locations <sup>d</sup> | 1                           | 1.20<br>(0.57 – 2.56) | 0.647   | --                           | --      |

| Variable              | Category   | Univariable Analyses  |         | Final Multivariable Analysis |         |
|-----------------------|------------|-----------------------|---------|------------------------------|---------|
|                       |            | Odds Ratio (95% CI)   | P-value | Odds Ratio (95% CI)          | P-value |
|                       | 2          | 1.65<br>(0.58 – 4.70) |         | --                           |         |
|                       | 3          | 1                     |         | --                           |         |
| Bilirubin at Baseline | <1.0 mg/dL | 2.38<br>(1.21 – 4.68) | 0.012   | 2.38<br>(1.21 – 4.68)        | 0.012   |
|                       | ≥1.0 mg/dL | 1                     |         | 1                            |         |
| Albumin at Baseline   | <3.6 g/dL  | 1.18<br>(0.65 – 2.15) | 0.581   | --                           | --      |
|                       | ≥3.6 g/dL  | 1                     |         | --                           |         |

CI = Confidence Interval

<sup>a</sup> Odds ratio for tumor absorbed dose corresponds to a 100 Gy increase in absorbed dose.

<sup>b</sup> Odds ratio corresponds to a 1 unit increase in this variable where 69.4% of patients had a solitary tumor, 21.5% had two tumors and 9.1% had ≥3 tumors.

<sup>c</sup> Odds ratio corresponds to a 1 unit increase in this variable where 33% of patients had an untreated liver fraction of <30%, 46.9% were 30-50% and 20.1% were >50%.

<sup>d</sup> Odds ratio corresponds to comparison of similarity scores between injection locations for <sup>99m</sup>Tc-MAA and TARE of 1) nearly identical (≤1 cm) with no influence of bifurcations, 2) similar location (>1 and ≤2 cm) with no influence of bifurcations, 3) dissimilar location (>2 cm) or influence of a bifurcation.

**Table S3. Univariable and Multivariable Cox Regression Analyses of Overall Survival**

| Variable                                      | Category                   | Univariable Analyses  |         | Final Multivariable Analysis |         |
|-----------------------------------------------|----------------------------|-----------------------|---------|------------------------------|---------|
|                                               |                            | Hazard Ratio (95% CI) | P-value | Hazard Ratio (95% CI)        | P-value |
| Tumor Absorbed Dose <sup>a</sup>              |                            |                       |         | 0.84 (0.72– 0.97)            | 0.016   |
| Gender                                        | Male                       | 1.27 (0.77– 2.11)     | 0.354   | --                           | --      |
|                                               | Female                     | 1                     |         |                              |         |
| Ascites at Baseline                           | Slight                     | 2.33 (1.33– 4.08)     | 0.003   | --                           | --      |
|                                               | Absent                     | 1                     |         |                              |         |
| Splenomegaly at Baseline                      | Present                    | 1.44 (0.97 – 2.13)    | 0.068   | --                           | --      |
|                                               | Absent                     | 1                     |         |                              |         |
| HCC Liver Status                              | Liver Cirrhosis            | 1.29 (0.56 – 2.97)    | 0.783   | --                           | --      |
|                                               | Liver Fibrosis             | 0.99 (0.20 – 4.94)    |         |                              |         |
|                                               | Normal Liver               | 1                     |         |                              |         |
| HCC Etiology                                  | Alcohol Use                | 1.02 (0.50 – 2.10)    | 0.982   | --                           | --      |
|                                               | Hepatitis C                | 0.89 (0.44 – 1.79)    |         |                              |         |
|                                               | NASH/NAFLD                 | 1.17 (0.52 – 2.60)    |         |                              |         |
|                                               | More than one HCC Etiology | 1.10 (0.44 – 2.73)    |         |                              |         |
|                                               | Unknown                    | 1.02 (0.51 – 2.03)    |         |                              |         |
|                                               | Hepatitis B                | 1                     |         |                              |         |
| Largest Tumor Size at Baseline by mRECIST     | < 3 cm                     | 0.45 (0.06 – 3.33)    | 0.879   | --                           | --      |
|                                               | ≥3 to <5 cm                | 1.01 (0.62 – 1.65)    |         |                              |         |
|                                               | ≥5 to <8 cm                | 0.95 (0.60 – 1.50)    |         |                              |         |
|                                               | ≥ 8 cm                     | 1                     |         |                              |         |
| Log Number of Tumors at Baseline <sup>b</sup> |                            | 0.79 (0.48 – 1.30)    | 0.344   | --                           | --      |
| Unilobar or Bilobar Disease                   | Bilobar                    | 1.47 (0.98 – 2.22)    | 0.066   | 1.55 (1.02 – 2.34)           | 0.041   |
|                                               | Unilobar                   | 1                     |         | 1                            |         |



| Variable                                                   | Category                    | Univariable Analyses  |         | Final Multivariable Analysis |         |
|------------------------------------------------------------|-----------------------------|-----------------------|---------|------------------------------|---------|
|                                                            |                             | Hazard Ratio (95% CI) | P-value | Hazard Ratio (95% CI)        | P-value |
| Child-Pugh at Baseline                                     | A5                          | 0.65<br>(0.44 – 0.96) | 0.030   | --                           | --      |
|                                                            | A6 or B7                    | 1                     |         | --                           |         |
| PVT at Baseline                                            | Present                     | 2.64<br>(1.77 – 3.92) | <0.0001 | 2.61<br>(1.75 – 3.89)        | <0.0001 |
|                                                            | Absent                      | 1                     |         | 1                            |         |
| Untreated liver fraction <sup>c</sup>                      |                             | 1.01<br>(1.00 – 1.02) | 0.129   | --                           | --      |
| Prior Sorafenib Treatment                                  | Yes                         | 1.15<br>(0.61 – 2.17) | 0.674   | --                           | --      |
|                                                            | No                          | 1                     |         | --                           |         |
| BCLC Stage at Baseline                                     | A                           | 0.36<br>(0.17 – 0.79) | 0.020   | --                           | --      |
|                                                            | B                           | 0.70<br>(0.46 – 1.06) |         | --                           |         |
|                                                            | C                           | 1                     |         | --                           |         |
| ALBI Score at Baseline                                     | 1                           | 0.66<br>(0.44 – 0.99) | 0.046   | --                           | --      |
|                                                            | 2 or 3                      | 1                     |         | --                           |         |
| PVT <sup>99m</sup> Tc-MAA targeting                        | No PVT                      | 0.46<br>(0.28 – 0.73) | <0.0001 | --                           | --      |
|                                                            | No PVT targeting            | 1.64<br>(0.90 – 2.98) |         | --                           |         |
|                                                            | PVT targeting               | 1                     |         | --                           |         |
| CT or MRI for Diagnostic and Response Imaging <sup>d</sup> | CT                          | 0.61<br>(0.39 – 0.95) | 0.028   | 0.58<br>(0.37 – 0.91)        | 0.017   |
|                                                            | MRI                         | 1                     |         | 1                            |         |
| Pre-procedural <sup>99m</sup> Tc- MAA SPECT vs SPECT/CT    | <sup>99m</sup> Tc-MAA SPECT | 1.37<br>(0.84 – 2.23) | 0.214   | --                           | --      |
|                                                            | SPECT/CT                    | 1                     |         | --                           |         |
| Week of TARE Administration                                | Second                      | 1.13<br>(0.74 – 1.72) | 0.583   | --                           | --      |
|                                                            | First                       | 1                     |         | --                           |         |
| Deformable Registration                                    | Yes                         | 0.92<br>(0.61 – 1.38) | 0.677   | --                           | --      |
|                                                            | No                          | 1                     |         | --                           |         |
| Similarity Score Between Injection Locations <sup>e</sup>  | 1                           | 0.85<br>(0.52 – 1.39) | 0.760   | --                           | --      |

| Variable              | Category   | Univariable Analyses  |         | Final Multivariable Analysis |         |
|-----------------------|------------|-----------------------|---------|------------------------------|---------|
|                       |            | Hazard Ratio (95% CI) | P-value | Hazard Ratio (95% CI)        | P-value |
|                       | 2          | 0.99<br>(0.52 – 1.86) |         | --                           |         |
|                       | 3          | 1                     |         | --                           |         |
| Bilirubin at Baseline | <1.0 mg/dL | 0.76<br>(0.51 – 1.14) | 0.184   | --                           | --      |
|                       | ≥1.0 mg/dL | 1                     |         | --                           |         |
| Albumin at Baseline   | <3.6 g/dL  | 1.31<br>(0.89 – 1.94) | 0.175   | --                           | --      |
|                       | ≥3.6 g/dL  | 1                     |         | --                           |         |

CI = Confidence Interval

<sup>a</sup> Hazard ratio for tumor absorbed dose corresponds to a 100 Gy increase in absorbed dose.

<sup>b</sup> Hazard ratio corresponds to a 1 unit increase in this variable where 69.4% of patients had a solitary tumor, 21.5% had two tumors and 9.1% had ≥3 tumors.

<sup>c</sup> Hazard ratio corresponds to a 1 unit increase in this variable where 33% of patients had an untreated liver fraction of <30%, 46.9% were 30-50% and 20.1% were >50%.

<sup>d</sup> The impact on OS due to CT versus MRI for diagnostic and response imaging described above is unexpected and is likely due to confounding with other clinical factors that were not recorded in the study and so could not be included in the modelling performed, and so should be interpreted with caution.

<sup>e</sup> Hazard ratio corresponds to comparison of similarity scores between injection locations for <sup>99m</sup>Tc-MAA and TARE of 1) nearly identical (≤1 cm) with no influence of bifurcations, 2) similar location (>1 and ≤2 cm) with no influence of bifurcations, 3) dissimilar location (>2 cm) or influence of a bifurcation.
